# Supplementary material for: Compressed Sensing Real-Time Cine Reduces CMR Arrhythmia-Related Artifacts
Source: MDPI journal article supplement (doi:10.3390/jcm10153274), 2021-07-24
Supplement: s1 [file s1]

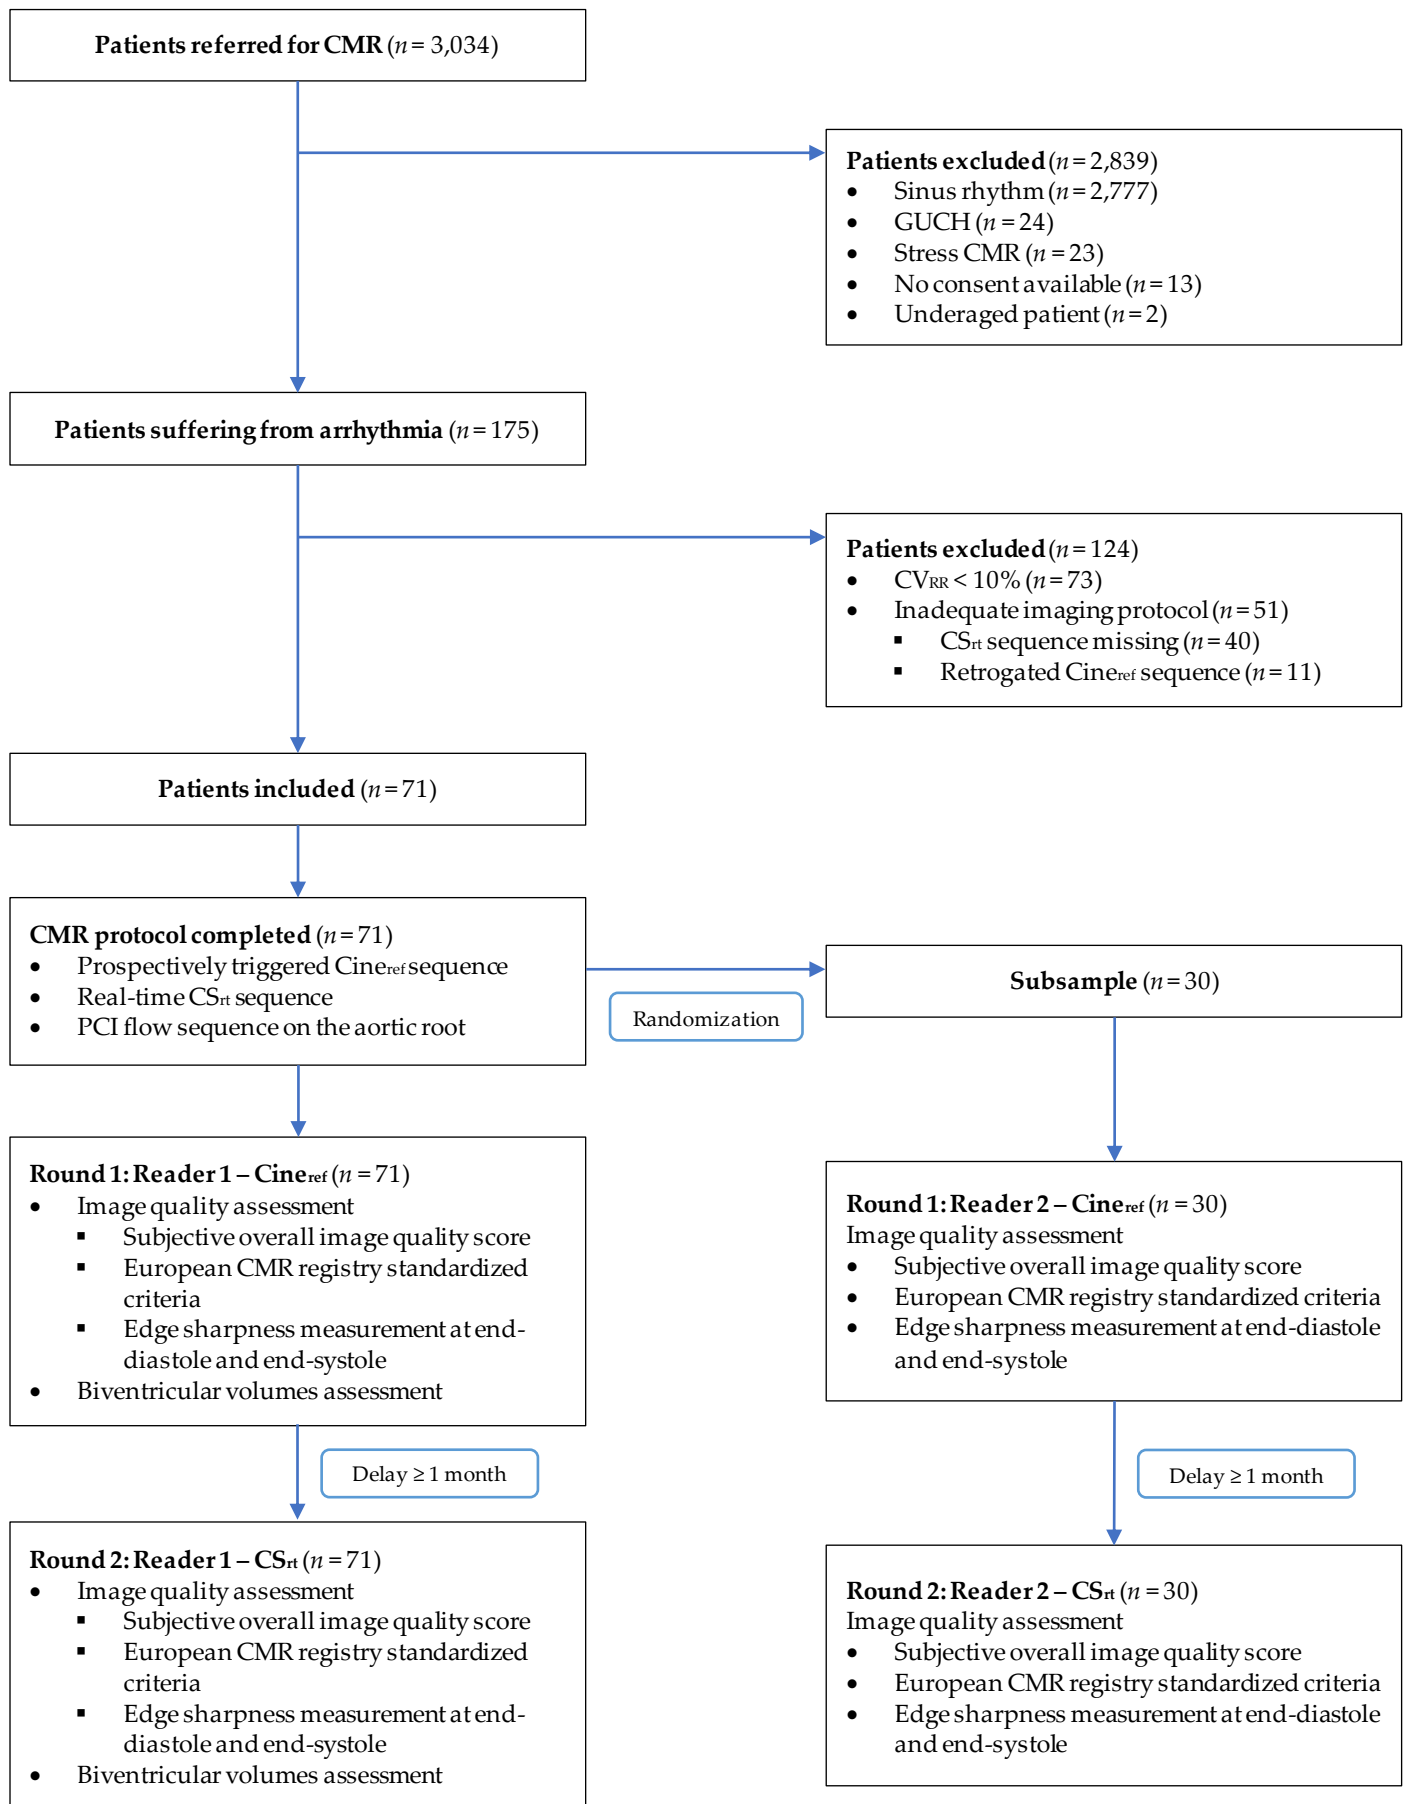

**Figure S1:** Study design. Student's t test and analysis of variance were used for volumes assessments comparisons. Wilcoxon signed-rank test was used for subjective and EuroCMR quality scores. Student's t test was used for edge sharpness comparison. Intraclass coefficient correlation assessed the interobserver agreement.

Abbreviations: GUCH, grown-up congenital heart disease; CMR, cardiac magnetic resonance;  $CV_{RR}$ , coefficient of variation of RR intervals;  $CS_{rt}$ , real-time compressed sensing cine; Cine<sub>ref</sub>, reference prospectively triggered segmented cine; PCI, phase contrast imaging; EuroCMR, European CMR registry.
